# Supplementary material for: Novel cost-effective synthesis of non-doped turbostratic graphene from a graphite intercalation compound: development of a durable and stable electrocatalyst for the oxygen reduction reaction
Source: Royal Society of Chemistry journal article supplement (doi:10.1039/d1nj03106f), 2021-01-01
Supplement: d1nj03106f1.pdf [file d1nj03106f1.pdf]

**Novel Cost-effective Synthesis of Non-doped Turbostratic Graphene from Graphite**  
**Intercalation compound: Development of a Durable and Stable Electrocatalyst for**  
**Oxygen Reduction Reaction**

Vijayasree Haridas<sup>1</sup>, Zahira Yaakob<sup>2</sup>, Sankaran Sugunan<sup>2</sup>, Binitha N. Narayanan<sup>1,\*</sup>

<sup>1</sup>Department of Chemistry, Sree Neelakanta Government Sanskrit College

Pattambi, Palakkad-679306, Kerala, India

Ph: +91 466-2212223. Fax: +91-466-2212223, \*binithann@yahoo.co.in

<sup>2</sup> Department of Chemical and Process Engineering, Faculty of Engineering and Built Environment, Universiti Kebangsaan Malaysia, UKM Bangi 43600, Selangore, Malaysia

<sup>3</sup>Department of Applied Chemistry, Cochin University of Science and Technology,

Cochin 22, Kerala, India

Table S1. Performance of various graphene-modified electrodes in the oxygen reduction reaction.

| Sl.No | Catalyst                         | Current density (mAcm <sup>-2</sup> ) | Onset potential (V) | Half-wave potential (V) | Ref |
|-------|----------------------------------|---------------------------------------|---------------------|-------------------------|-----|
| 1     | S1N6C900*                        | 4.86                                  | 0.95                | 0.83                    | 1   |
| 2.    | N-graphene (900) <sup>+</sup>    | -                                     | 0.308 vs SHE        | 0.43                    | 2   |
| 3.    | N, S-doped graphene <sup>@</sup> | -3.49 to 4.17                         | 0.87                | -                       | 3   |
| 4.    | NrGO <sup>#</sup>                | 2.5                                   | 1.1                 | 0.84                    | 4   |

|    |                                                     |       |                     |       |              |
|----|-----------------------------------------------------|-------|---------------------|-------|--------------|
| 5. | NG <sup>§</sup>                                     | -     | -0.10 vs<br>Ag/AgCl | -     | 5            |
| 6. | NG-C <sup>&amp;</sup>                               | -3.3  | 0                   | -     | 6            |
| 7. | g-C <sub>3</sub> N <sub>4</sub> @GO                 | 5.98  | 0.98                | 0.859 | 7            |
| 8. | Fe <sub>3</sub> O <sub>4</sub> /N-Gas <sup>**</sup> | -2.56 | -0.19 vs<br>Ag/AgCl | -     | 8            |
| 9. | Turbostratic graphene                               | -6.45 | 0.92                | 0.80  | This<br>work |

<sup>\*</sup>S, N dual-doped Graphene liked carbon nanosheet, + N-graphene (900), @N,S-doped graphene Co/N<sub>3</sub>S<sub>3</sub>-GF and Mn/N<sub>3</sub>S<sub>3</sub>-GF, <sup>#</sup>Nitrogen-doped reduced-graphene oxide, <sup>§</sup>Nitrogen-doped graphene, <sup>&</sup>N-doped graphene from citric acid, <sup>\*\*</sup>Three-dimensional (3D) N-doped graphene aerogel (N-GA)-supported Fe<sub>3</sub>O<sub>4</sub> nanoparticles.

## References

- (1) Li, J.; Zhang, Y.; Zhang, X.; Huang, J.; Han, J.; Zhang, Z.; Han, X.; Xu, P.; Song, B. S. N Dual-Doped Graphene-like Carbon Nanosheets as Efficient Oxygen Reduction Reaction Electrocatalysts. *ACS Appl. Mater. Interfaces* **2017**, *9* (1), 398–405. <https://doi.org/10.1021/acsami.6b12547>.
- (2) Geng, D.; Chen, Y.; Chen, Y.; Li, Y.; Li, R.; Sun, X.; Ye, S.; Knights, S. High Oxygen-Reduction Activity and Durability of Nitrogen-Doped Graphene. *Energy Environ. Sci.* **2011**, *4* (3), 760–764. <https://doi.org/10.1039/C0EE00326C>.
- (3) Fernandes, D. M.; Mathumba, P.; Fernandes, A. J. S.; Iwuoha, E. I.; Freire, C. Towards Efficient Oxygen Reduction Reaction Electrocatalysts through Graphene Doping. *Electrochimica Acta* **2019**, *319*, 72–81. <https://doi.org/10.1016/j.electacta.2019.06.175>.
- (4) Dumont, J. H.; Martinez, U.; Artyushkova, K.; Purdy, G. M.; Dattelbaum, A. M.; Zelenay, P.; Mohite, A.; Atanassov, P.; Gupta, G. Nitrogen-Doped Graphene Oxide Electrocatalysts for the Oxygen Reduction Reaction. *ACS Appl. Nano Mater.* **2019**, *2* (3), 1675–1682. <https://doi.org/10.1021/acsanm.8b02235>.
- (5) Lin, Z.; Waller, G.; Liu, Y.; Liu, M.; Wong, C.-P. Facile Synthesis of Nitrogen-Doped Graphene via Pyrolysis of Graphene Oxide and Urea, and Its Electrocatalytic Activity toward the Oxygen-Reduction Reaction. *Adv. Energy Mater.* **2012**, *2* (7), 884–888. <https://doi.org/10.1002/aenm.201200038>.

- (6) Liao, Y.; Gao, Y.; Zhu, S.; Zheng, J.; Chen, Z.; Yin, C.; Lou, X.; Zhang, D. Facile Fabrication of N-Doped Graphene as Efficient Electrocatalyst for Oxygen Reduction Reaction. *ACS Appl. Mater. Interfaces* **2015**, *7* (35), 19619–19625. <https://doi.org/10.1021/acsami.5b05649>.
- (7) Xiang, Q.; Liu, Y.; Zou, X.; Hu, B.; Qiang, Y.; Yu, D.; Yin, W.; Chen, C. Hydrothermal Synthesis of a New Kind of N-Doped Graphene Gel-like Hybrid As an Enhanced ORR Electrocatalyst. *ACS Appl. Mater. Interfaces* **2018**, *10* (13), 10842–10850. <https://doi.org/10.1021/acsami.7b19122>.
- (8) Wu, Z.-S.; Yang, S.; Sun, Y.; Parvez, K.; Feng, X.; Müllen, K. 3D Nitrogen-Doped Graphene Aerogel-Supported Fe<sub>3</sub>O<sub>4</sub> Nanoparticles as Efficient Electrocatalysts for the Oxygen Reduction Reaction. *J. Am. Chem. Soc.* **2012**, *134* (22), 9082–9085. <https://doi.org/10.1021/ja3030565>.
